# Supplementary material for: Eggshell waste derived nano-hydroxyapatite/metakaolin composites for bone scaffold applications
Source: Royal Society of Chemistry journal article supplement (doi:10.1039/d6ra01169a), 2026-04-17
Supplement: d6ra01169a1.pdf [file d6ra01169a1.pdf]

## Supplementary Information

### Eggshell Waste Derived Nano-Hydroxyapatite/Metakaolin Composites for Bone Scaffold Applications

Zaid Kareem<sup>a,b,\*</sup> and Ersan Eyiler<sup>b,c,d</sup>

<sup>a</sup>Prosthetics and Orthotics Engineering Department, University of Kerbala, Iraq

<sup>b</sup>Advanced Materials and Nanotechnology Department, Cukurova University, Adana, Turkey

<sup>c</sup>Department of Chemical Engineering, Cukurova University, Adana, Turkey

<sup>d</sup>Tissue Engineering Department, Cukurova University, Adana, Turkey

Correspondence to: Zaid Kareem (E-mail: zaltaey88@gmail.com)

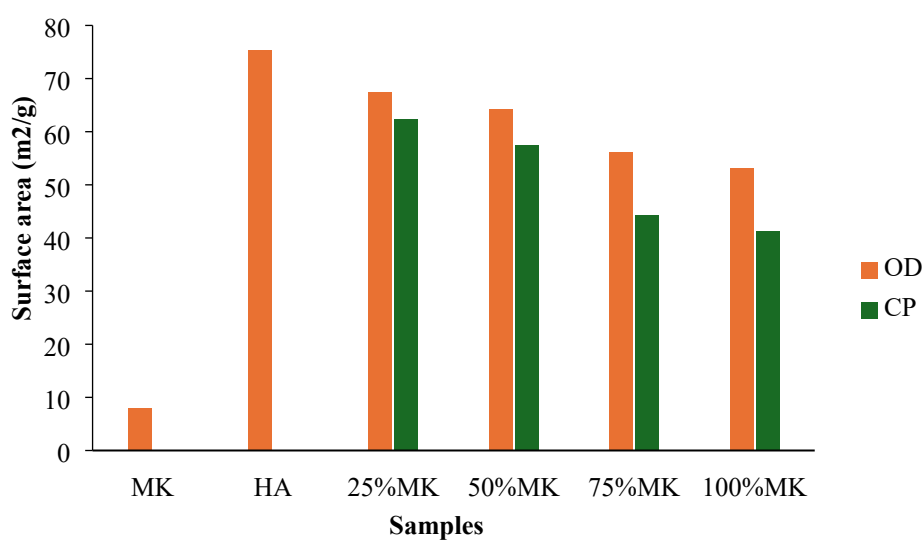

**Fig. S1.** Surface area of MK, HA and HA/MK composites (CP and OD).

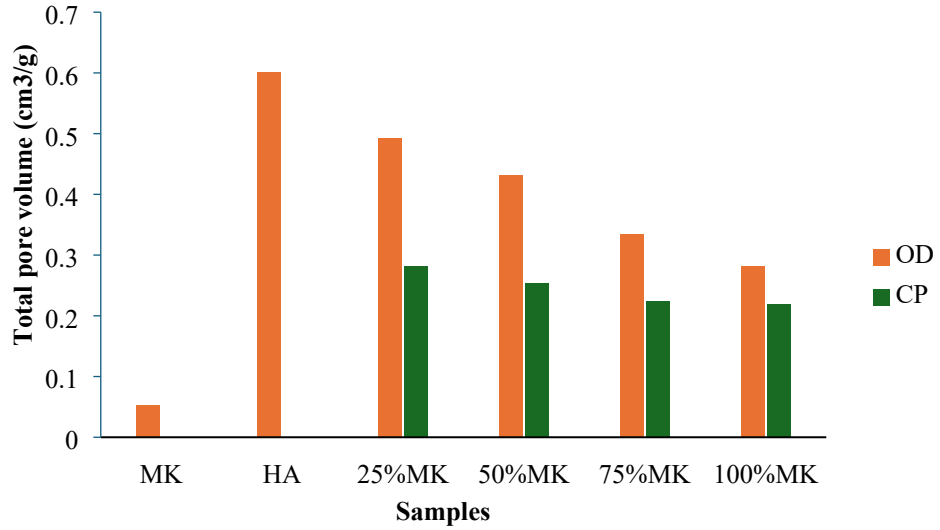

**Fig. S2.** Total pore volume of MK, HA and HA/MK composites (CP and OD).

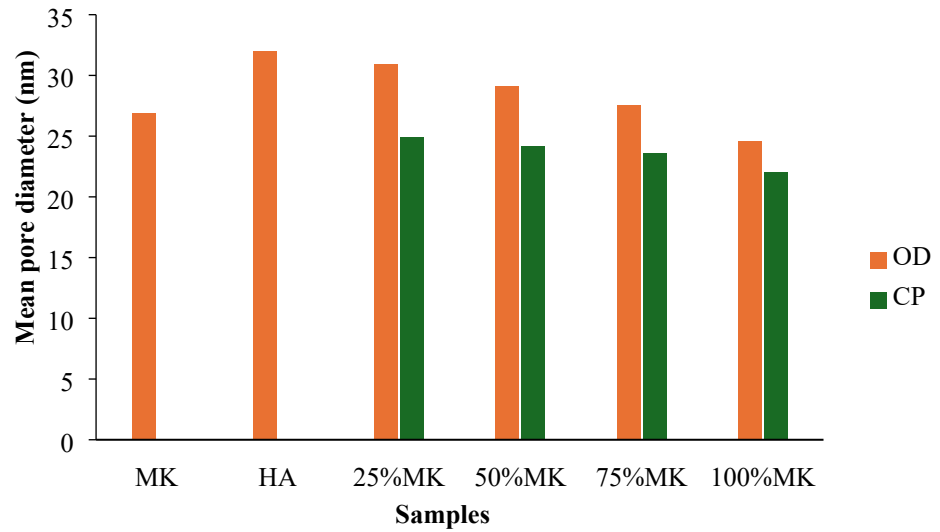

**Fig. S3.** Mean pore diameter of MK, HA and HA/MK composites (CP and OD).

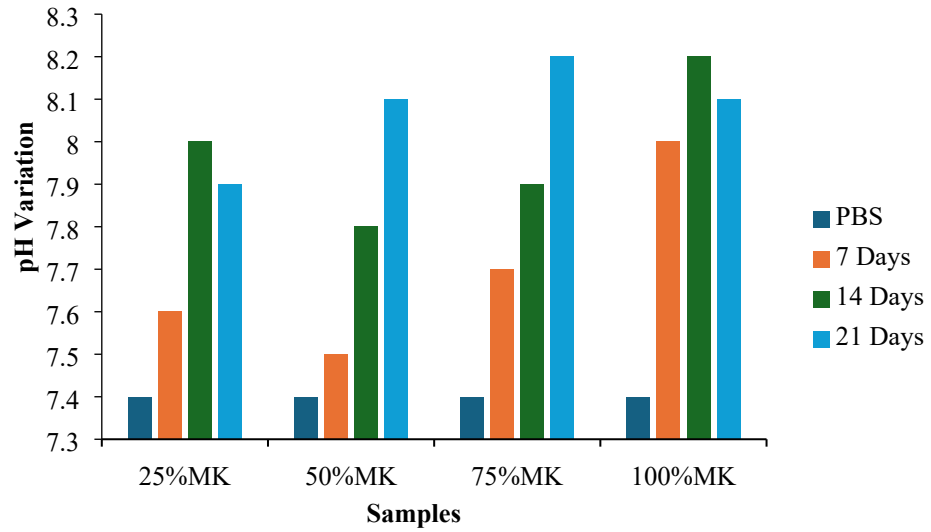

**Fig. S4.** pH variation of PBS under immersion of HA/MK composites (CP) for 7, 14 and 21 days.

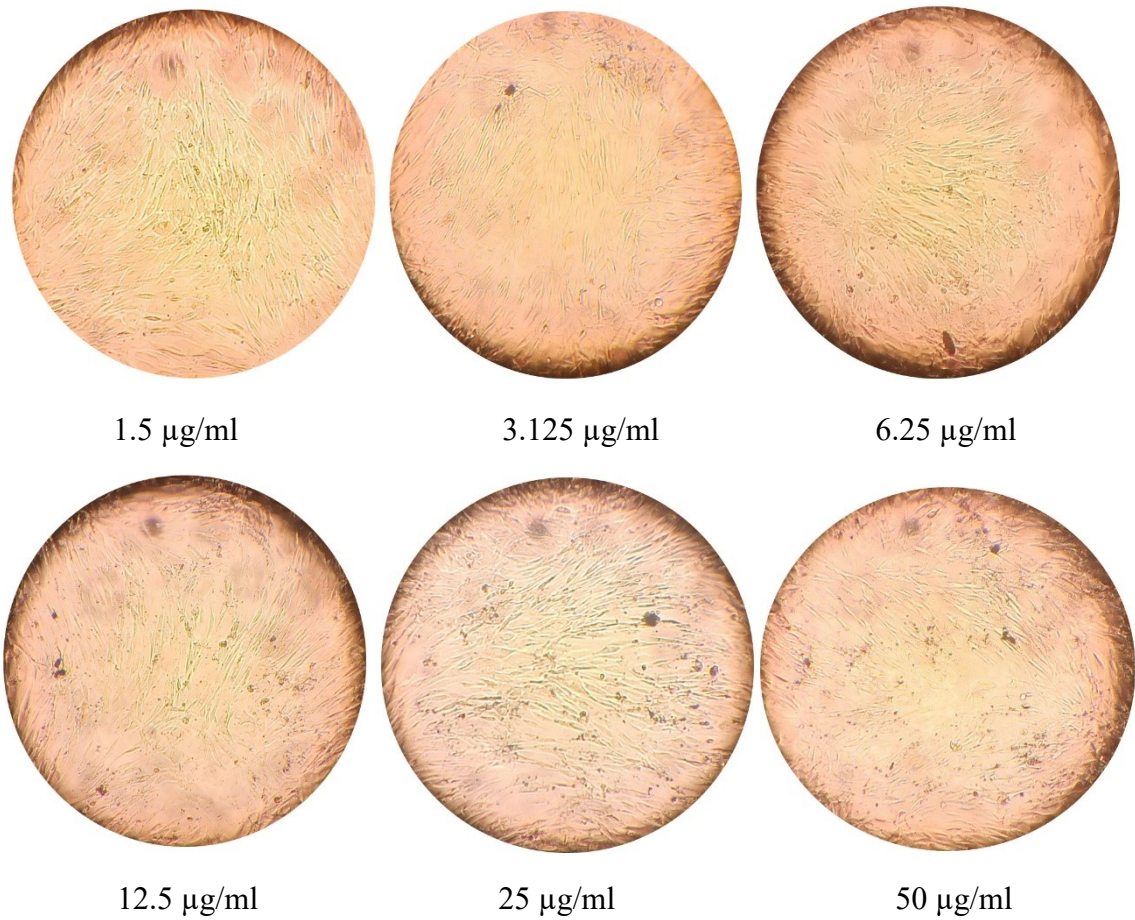

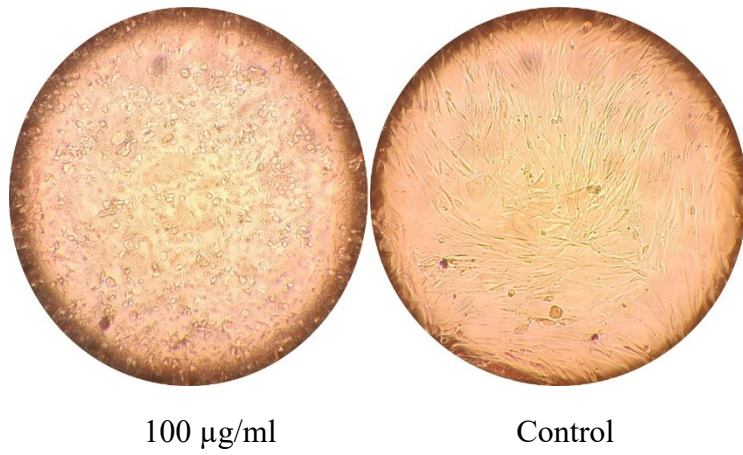

**Fig. S5.** Optical microscope images of MC3T3-E1 cells exposed to varying concentrations of 25%MK after 48 h at 37 °C.
